# Supplementary material for: Prevalence and risk factors for hyperthyroidism in Irish cats from the greater Dublin area
Source: PubMed Central journal article supplement (PMC5769238; doi:10.1186/s13620-017-0113-x), 2018-01-15
Supplement: 13620_2017_113_MOESM1_ESM.pdf [file 13620_2017_113_MOESM1_ESM.pdf]

# QUESTIONNAIRE – PART I (TO BE COMPLETED BY VETERINARIAN)

---

- 1-2ml of blood in lithium heprin  (✓ tick here) or in serum gel  (✓ tick here) has been submitted.

- Choose a method for results to be relayed to you (enter the relevant contact information in the space provided):

Telephone  (✓ tick here) \_\_\_\_\_, fax  (✓ tick here) \_\_\_\_\_

or email  (✓ tick here) \_\_\_\_\_

---

Name of vet: \_\_\_\_\_ Date: \_\_\_\_\_

Name of clinic: \_\_\_\_\_

I confirm that the cat sampled is **not** under treatment for hyperthyroidism at present  (✓ tick here)

Owner name: \_\_\_\_\_ Cat name: \_\_\_\_\_

## Reason for visit

---

- Routine health check
- Vaccination
- Illness  (specify) \_\_\_\_\_

## Clinical examination findings

---

- Has the cat lost weight in the last 3 months? Yes  No
- Is the cat eating excessively? Yes  No
- Heart rate: <200   
200-240   
>240
- Is a cardiac murmur audible? Yes  No
- Respiratory rate: Normal   
Increased   
Dyspnoeic
- Does the cat vomit? Yes  No
- Does the cat have diarrhoea? Yes  No
- Are the thyroid glands palpable?  
Unsure  No   
Right only  Left only  Both

# QUESTIONNAIRE – PART II (TO BE COMPLETED BY OWNER AT TIME OF SAMPLING)

---

Owner name: \_\_\_\_\_

Cat name: \_\_\_\_\_

Breed: \_\_\_\_\_

Sex: Male   
Female   
Neutered

Age of cat / year of birth: \_\_\_\_\_

- How long have you **owned** your cat?

Less than 5 years   
5-10yrs   
More than 10 years

- **Number** of cats in household:

1   
2   
More than 2

## Vaccination/worming history

---

- Is your cat vaccinated? Yes  No  Not sure  **Frequency:** Yearly  Infrequently
- Do you de-worm/de-flea your cat? Yes  No  Not sure  **Frequency:** Yearly  Infrequently
- Type of preparation? Spot-on  Powder  Collar  Spray  Oral   
**Brand (if known)** \_\_\_\_\_

## Environment

---

- Does your cat live: always indoors  always outdoors  indoors and outdoors

## Diet / food

---

- Indicate below which food(s) your cat is fed and also, if mixed, the most commonly used mixture:

|                                                 |                          |                          |                             |                          |                          |
|-------------------------------------------------|--------------------------|--------------------------|-----------------------------|--------------------------|--------------------------|
| Commercial canned food                          | <input type="checkbox"/> | <input type="checkbox"/> | Commercial dry food         | <input type="checkbox"/> | <input type="checkbox"/> |
| Commercial pouches                              | <input type="checkbox"/> | <input type="checkbox"/> | Non-commercial food         | <input type="checkbox"/> | <input type="checkbox"/> |
| Mixture of commercial and noncommercial rations | <input type="checkbox"/> | <input type="checkbox"/> | Mixture of wet and dry food | <input type="checkbox"/> | <input type="checkbox"/> |

- If your cat is fed canned food is it: Ring-pull can  Tin requiring an opener

- Does your cat have a favourite brand/flavour that you use most frequently?

\_\_\_\_\_

- Has your cat had a major change in diet over the last 5 years? Yes  No  Unsure

- If you answered 'Yes' to the above, describe the diet prior to this change:

\_\_\_\_\_  
\_\_\_\_\_
